# Supplementary material
Source: publisher figshare collection journal article supplement (https://acs.figshare.com/ndownloader/files/4054138)
Supplement: Supplementary file 1 [file 4054138]

Supporting Information for

**Development and Scale-Up of an Optimized  
Route to the Pyridazin-3-one Histamine H3  
Receptor Antagonist CEP-32215**

*Yi Wang,<sup>†</sup> Katrin Przyuski,<sup>†</sup> Renee C. Roemmele\*,<sup>†</sup> Robert L. Hudkins,<sup>‡</sup> and Roger P. Bakale,<sup>†</sup>*

<sup>†</sup>Worldwide Process Research & Development, Teva Pharmaceuticals,

383 Phoenixville Pike, Malvern, PA 19355.

<sup>‡</sup>Discovery Research, Teva Pharmaceuticals., 145 Brandywine Parkway, West Chester, PA

Email: [Renee.Roemmele@tevapharm.com](mailto:Renee.Roemmele@tevapharm.com)

### Catalyst Screening For Suzuki Coupling of Boronic Acid **24** and Acid Chloride **21**

| Entry           | Catalyst                                                             | Base                            | Solvent (vol)               | Temp (°C) | Time (h) | <b>24</b> (A%) | <b>25</b> (A%) |
|-----------------|----------------------------------------------------------------------|---------------------------------|-----------------------------|-----------|----------|----------------|----------------|
| 1               | Pd(PPh <sub>3</sub> ) <sub>2</sub> Cl <sub>2</sub>                   | Cs <sub>2</sub> CO <sub>3</sub> | Toluene (10)                | 80        | 2.5      | 10             | 48             |
| 2               | Pd(PPh <sub>3</sub> ) <sub>2</sub> Cl <sub>2</sub> /PPh <sub>3</sub> | Cs <sub>2</sub> CO <sub>3</sub> | Toluene (10)                | 80        | 2.5      | 29             | 29             |
| 3               | Pd(o-Tol) <sub>3</sub> P) <sub>2</sub> Cl <sub>2</sub>               | Cs <sub>2</sub> CO <sub>3</sub> | Toluene (10)                | 80        | 2.5      | 0              | 35             |
| 4               | Pd(dppf) <sub>2</sub> Cl <sub>2</sub>                                | Cs <sub>2</sub> CO <sub>3</sub> | Toluene (10)                | 80        | 2.5      | 51             | 13             |
| 5               | Pd(OAc) <sub>2</sub> /BINAP                                          | Cs <sub>2</sub> CO <sub>3</sub> | Toluene (10)                | 80        | 2.5      | 37             | 23             |
| 6               | Pd(PPh <sub>3</sub> ) <sub>2</sub> Cl <sub>2</sub>                   | K <sub>3</sub> PO <sub>4</sub>  | Toluene (10)                | 80        | 2.5      | 77             | 6              |
| 7               | Pd(PPh <sub>3</sub> ) <sub>2</sub> Cl <sub>2</sub>                   | KOAc                            | Toluene (10)                | 80        | 2.5      | 30             | 22             |
| 8               | Pd(PPh <sub>3</sub> ) <sub>2</sub> Cl <sub>2</sub>                   | K <sub>2</sub> CO <sub>3</sub>  | Toluene (10)                | 80        | 2.5      | 78             | None           |
| 9               | Pd(PPh <sub>3</sub> ) <sub>2</sub> Cl <sub>2</sub>                   | Et <sub>3</sub> N               | Toluene (10)                | 80        | 2.5      | 100            | None           |
| 10              | Pd(PPh <sub>3</sub> ) <sub>2</sub> Cl <sub>2</sub>                   | Cs <sub>2</sub> CO <sub>3</sub> | Dioxane (10)                | 80        | 2        | 2              | 26             |
| 11              | Pd(PPh <sub>3</sub> ) <sub>2</sub> Cl <sub>2</sub>                   | Cs <sub>2</sub> CO <sub>3</sub> | 2-Me-THF (10)               | 80        | 2        | 4              | 28             |
| 12              | Pd(PPh <sub>3</sub> ) <sub>2</sub> Cl <sub>2</sub>                   | Cs <sub>2</sub> CO <sub>3</sub> | MIBK (10)                   | 80        | 2        | 28             | 14             |
| 13              | Pd(PPh <sub>3</sub> ) <sub>2</sub> Cl <sub>2</sub>                   | Cs <sub>2</sub> CO <sub>3</sub> | Tol/H <sub>2</sub> O (10/1) | 80        | 2        | 0              | 53             |
| 14              | Pd(PPh <sub>3</sub> ) <sub>2</sub> Cl <sub>2</sub>                   | Cs <sub>2</sub> CO <sub>3</sub> | Tol/H <sub>2</sub> O (10/1) | 60        | 2        | 0              | 61             |
| 15              | Pd(PPh <sub>3</sub> ) <sub>2</sub> Cl <sub>2</sub>                   | K <sub>2</sub> CO <sub>3</sub>  | Tol/H <sub>2</sub> O (10/1) | 60        | 2        | 3              | 51             |
| 16              | Pd(PPh <sub>3</sub> ) <sub>2</sub> Cl <sub>2</sub>                   | Cs <sub>2</sub> CO <sub>3</sub> | Tol/H <sub>2</sub> O (10/1) | 45        | 1        | 0              | 60             |
| 17              | Pd(PPh <sub>3</sub> ) <sub>4</sub>                                   | Cs <sub>2</sub> CO <sub>3</sub> | Tol/H <sub>2</sub> O (10/1) | 45        | 1        | 0              | 53             |
| 18              | Pd(PPh <sub>3</sub> ) <sub>2</sub> Cl <sub>2</sub>                   | Cs <sub>2</sub> CO <sub>3</sub> | Tol/H <sub>2</sub> O (10/1) | 45        | 1        | 2              | 60             |
| 19              | Pd(PPh <sub>3</sub> ) <sub>2</sub> Cl <sub>2</sub>                   | Cs <sub>2</sub> CO <sub>3</sub> | Tol/H <sub>2</sub> O (10/1) | 25        | 1        | 2              | 53             |
| 20 <sup>2</sup> | Pd(PPh <sub>3</sub> ) <sub>2</sub> Cl <sub>2</sub>                   | Cs <sub>2</sub> CO <sub>3</sub> | Tol/H <sub>2</sub> O (10/1) | 45        | 1        | 0              | 69             |
| 21 <sup>3</sup> | Pd(PPh <sub>3</sub> ) <sub>2</sub> Cl <sub>2</sub>                   | Cs <sub>2</sub> CO <sub>3</sub> | Tol/H <sub>2</sub> O (10/1) | 45        | 1        | 0              | 83             |
| 22 <sup>4</sup> | Pd(PPh <sub>3</sub> ) <sub>2</sub> Cl <sub>2</sub>                   | Cs <sub>2</sub> CO <sub>3</sub> | Tol/H <sub>2</sub> O (10/1) | 45        | 1        | 4              | 84             |

<sup>1</sup> Unless specified, the reaction has been carried out with 0.15 mmol of boronic acid (**6**), 1.1 equiv. of acid chloride (**10**), 1.5 equiv. of base, and 4 mol% catalyst in a sealed tube. <sup>2</sup> The reaction was carried out at 2 mmol scale, the catalyst loading was 2 mol%.

<sup>3</sup> The reaction was carried out at 0.3 mmol scale, the catalyst loading was 1 mol%.

<sup>4</sup> The reaction was carried out at 0.3 mmol scale, the catalyst loading was 0.5 mol%.
